# Supplementary material for: CD40 Generation 2.5 Antisense Oligonucleotide Treatment Attenuates Doxorubicin-induced Nephropathy and Kidney Inflammation
Source: PubMed Central journal article supplement (PMC5014534; doi:10.1038/mtna.2015.40), 2015-12-01
Supplement: mtna201540x1.pdf [file mtna201540x1.pdf]

## Supplementary Material

**Figure S1. Malat1 ASO activity (ISH) and distribution (IHC) in the kidney.** Mice were treated with PBS or 100 mg/kg Malat1 ASO for 4 wks and kidney Malat1 RNA expression was evaluated in (A) PBS-treated mice or (B) Malat1 ASO-treated mice by ISH. (C) The distribution of ASO accumulation by IHC using an anti-ASO Ab. Black arrows denote interstitial sites demonstrating Malat1 ASO activity (B) and accumulation (C). Scale bar = 50  $\mu$ m

**Figure S2. Tolerability and activity evaluation of the lead CD40 ASO in inflammation-naïve mice.** The lead CD40 ASO was evaluated in C57BL/6 mice after four weeks of SC administration of 50 and 100 mg/kg/wk. Basic measures of tolerability (body and spleen weights, plasma bilirubin, BUN and ALT) were assessed and CD40 RT-PCR was performed in the liver and kidney.

**Figure S3. Dose responsive reduction of CD40-dependent inflammation with CD40 ASO treatments and leukocyte mRNA marker expression following CD40 mAb administration.** (A) To evaluate dose-responsive CD40 ASO activity following CD40-dependent inflammation, C57BL/6 mice were given 40, 15 or 5 mg/kg ASO treatments on days 0 and 7, followed by 25  $\mu$ g of the activating CD40 mAb on day 10, kidneys were harvested on day 11 and CD40, CCL5 and IL12p40 mRNA levels were measured by RT-PCR. (B) mRNA markers of specific leukocyte populations (F4/80, CD19 and CD3d) were analyzed by RT-PCR in control mice and mice administered the CD40 mAb 24 hrs prior to sacrifice.

**Figure S4. CD40 mRNA expression in blood PBMC cells 6 weeks post BMT.** Verification of bone marrow reconstitution was performed by RT-PCR using two different CD40 primer probe sets that either amplify CD40 mRNA in WT and CD40 KO leukocytes (PPSet #3483) or only in WT

leukocytes (PPSet #1280). The six groups shown were treated with CD40 ASO and/or CD40 Ab as described in Figure 3f.

**Table S1. CD40 ASO treatment effects on kidney T cell and macrophage markers in DOX nephropathy.**

**Table S2. Primer and probe sequences used for RT-PCR.**

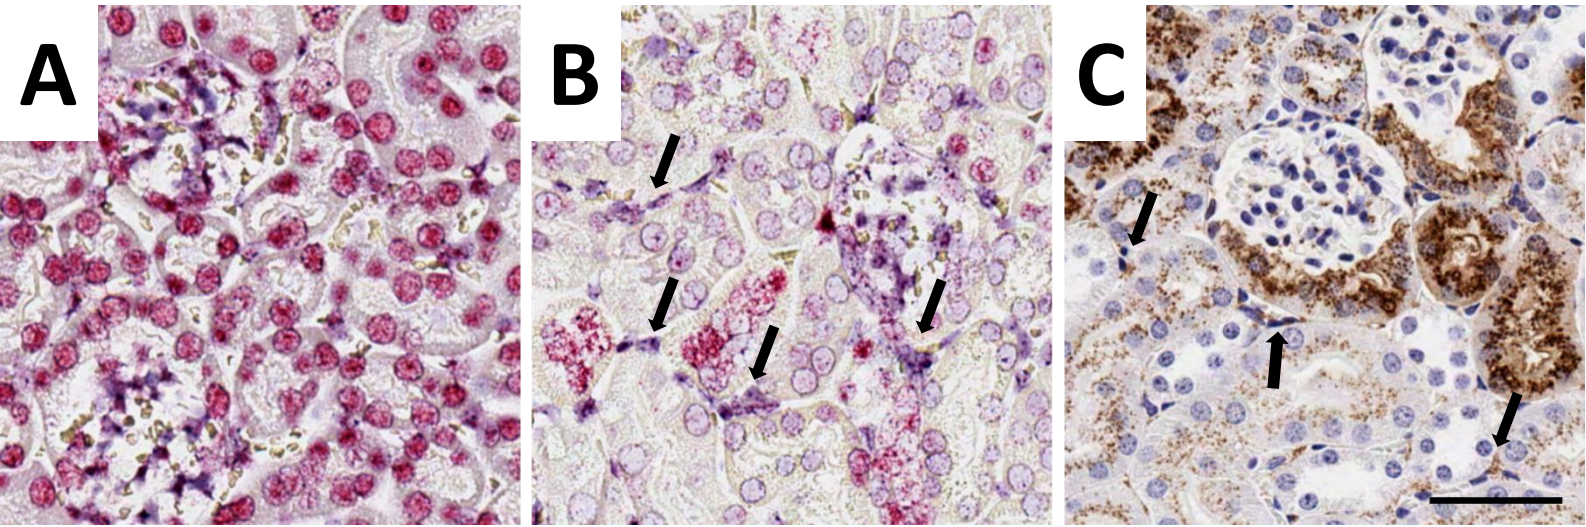

Figure S1

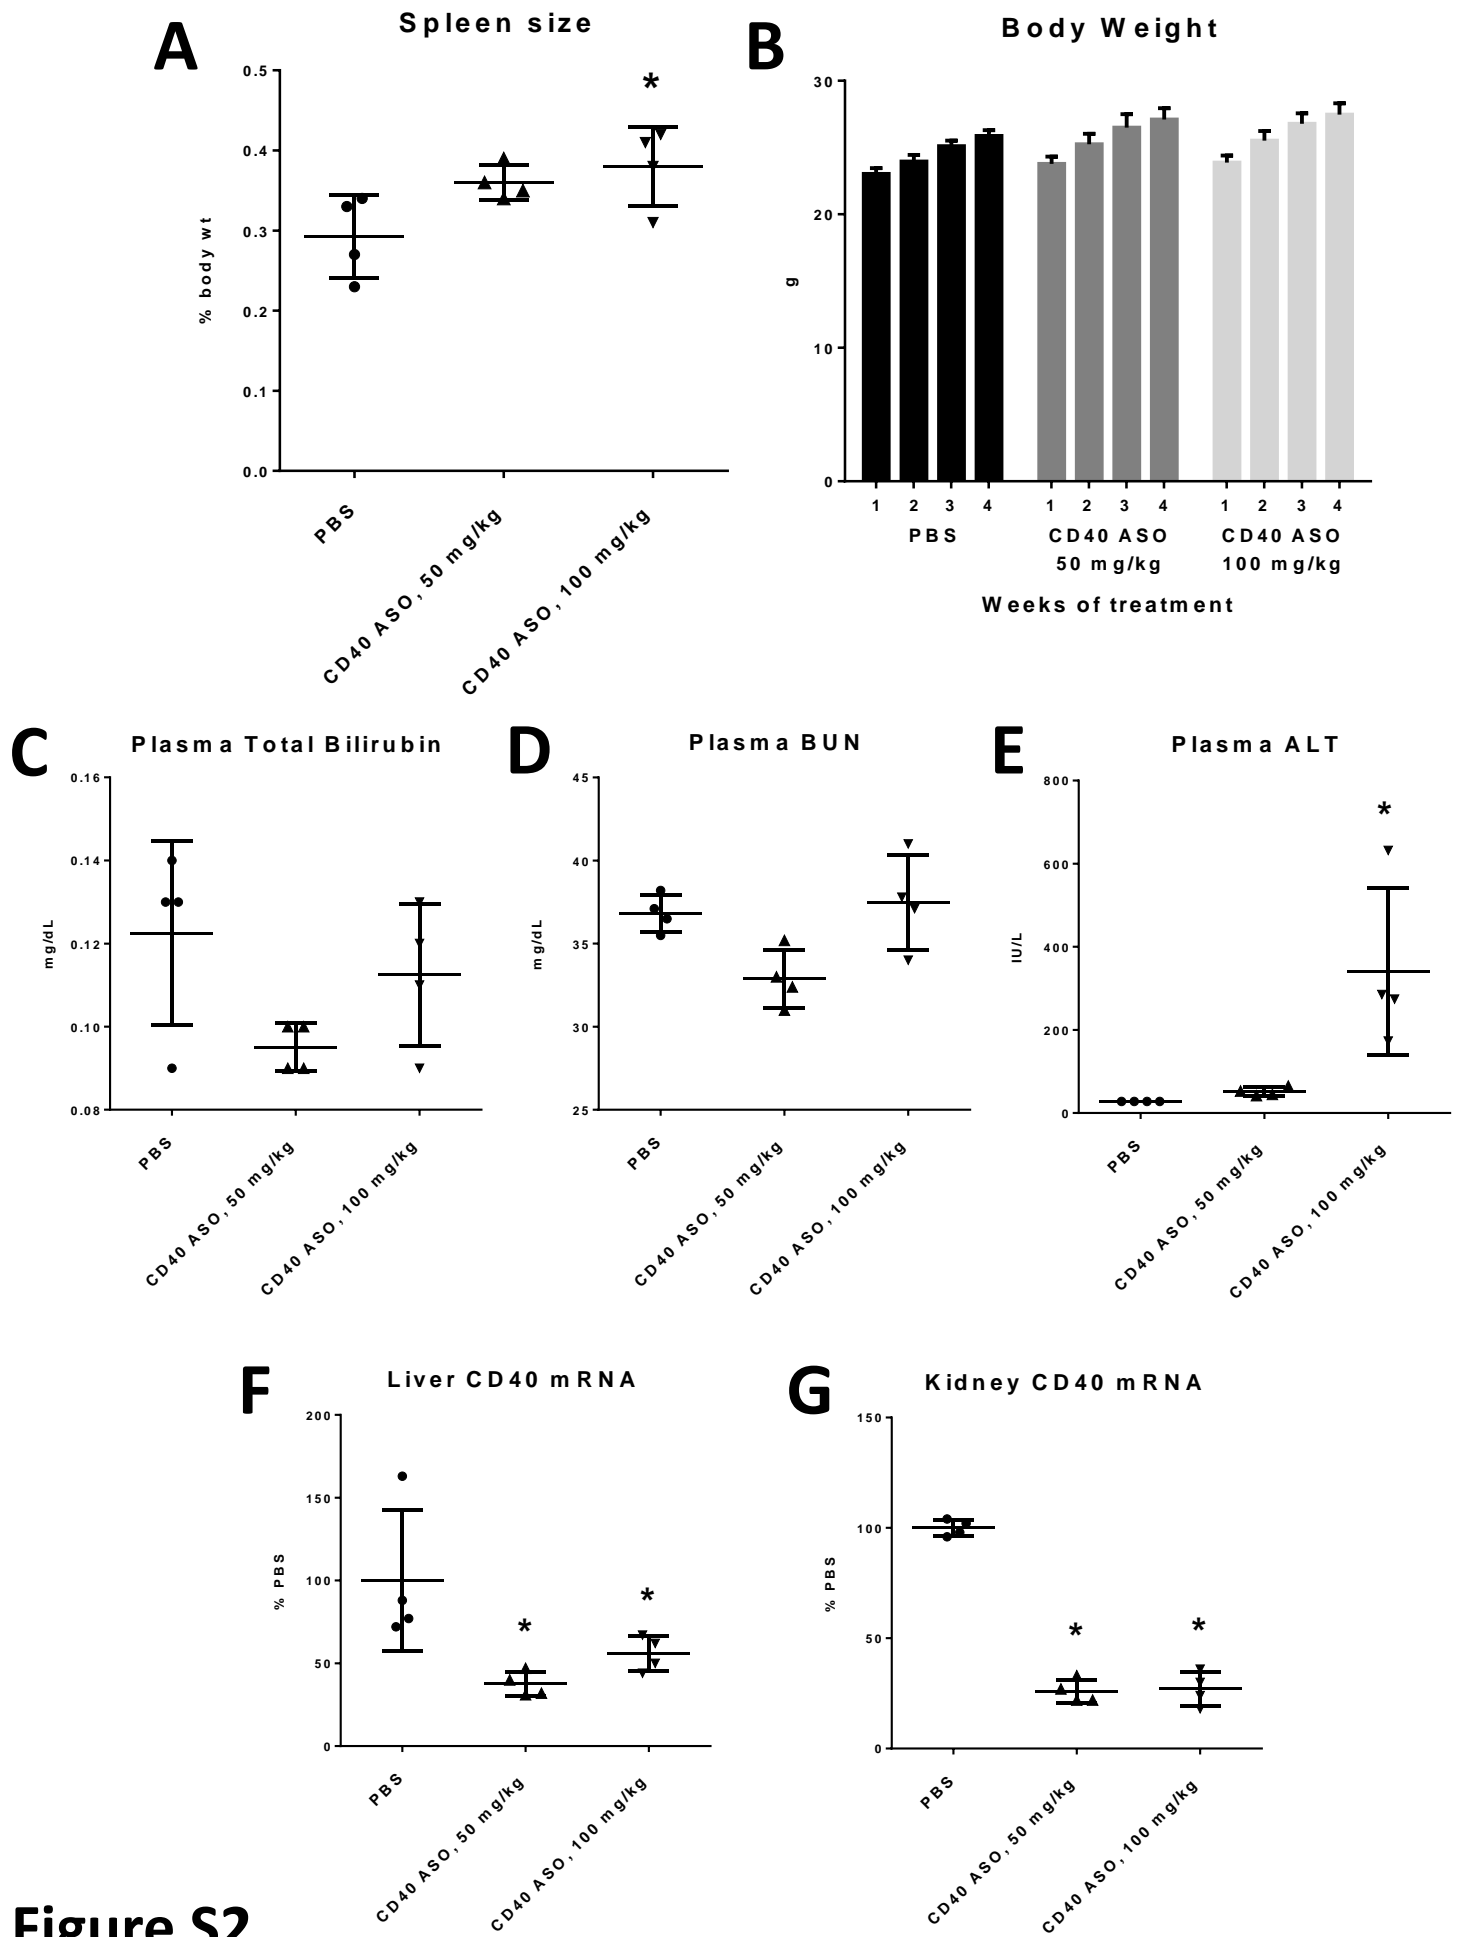

Figure S2

**A**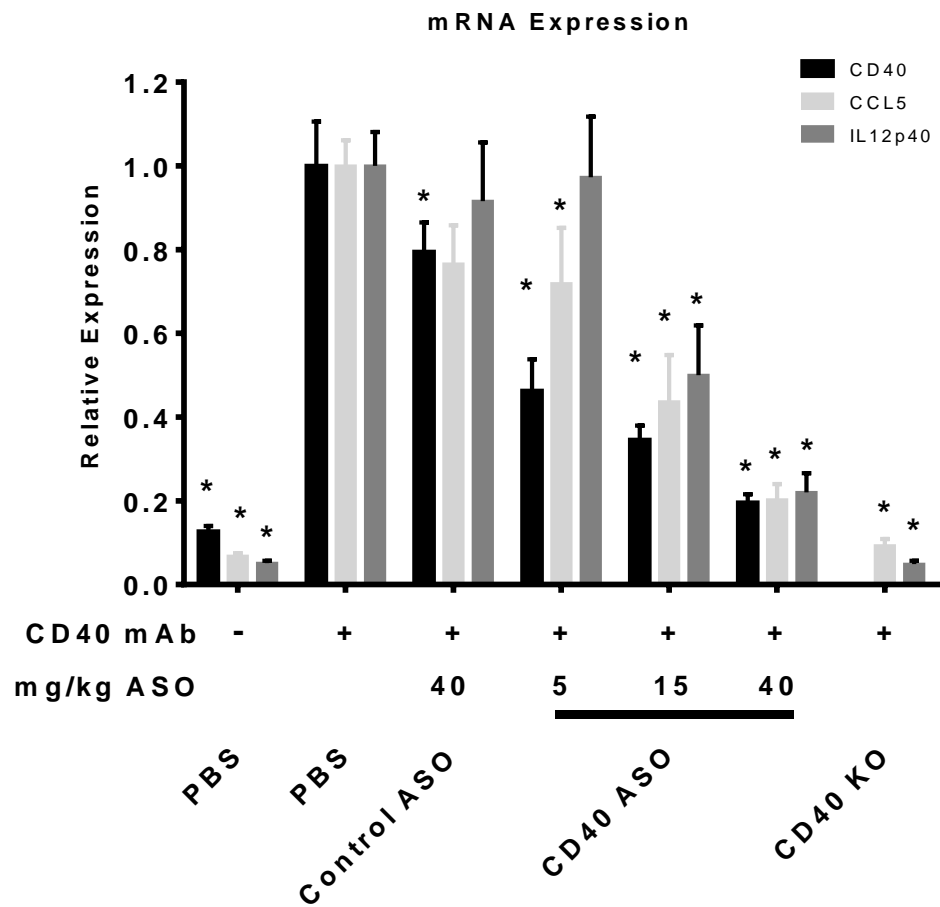**B**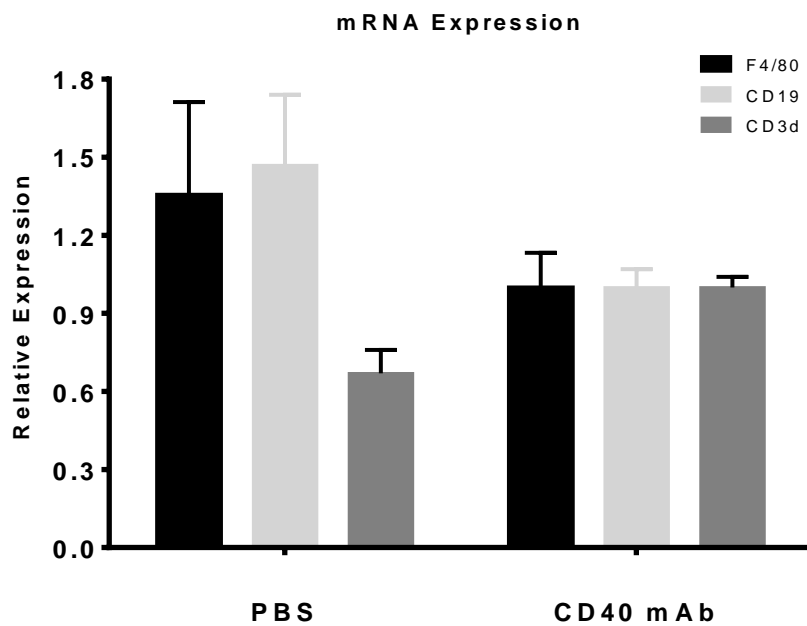**Figure S3**

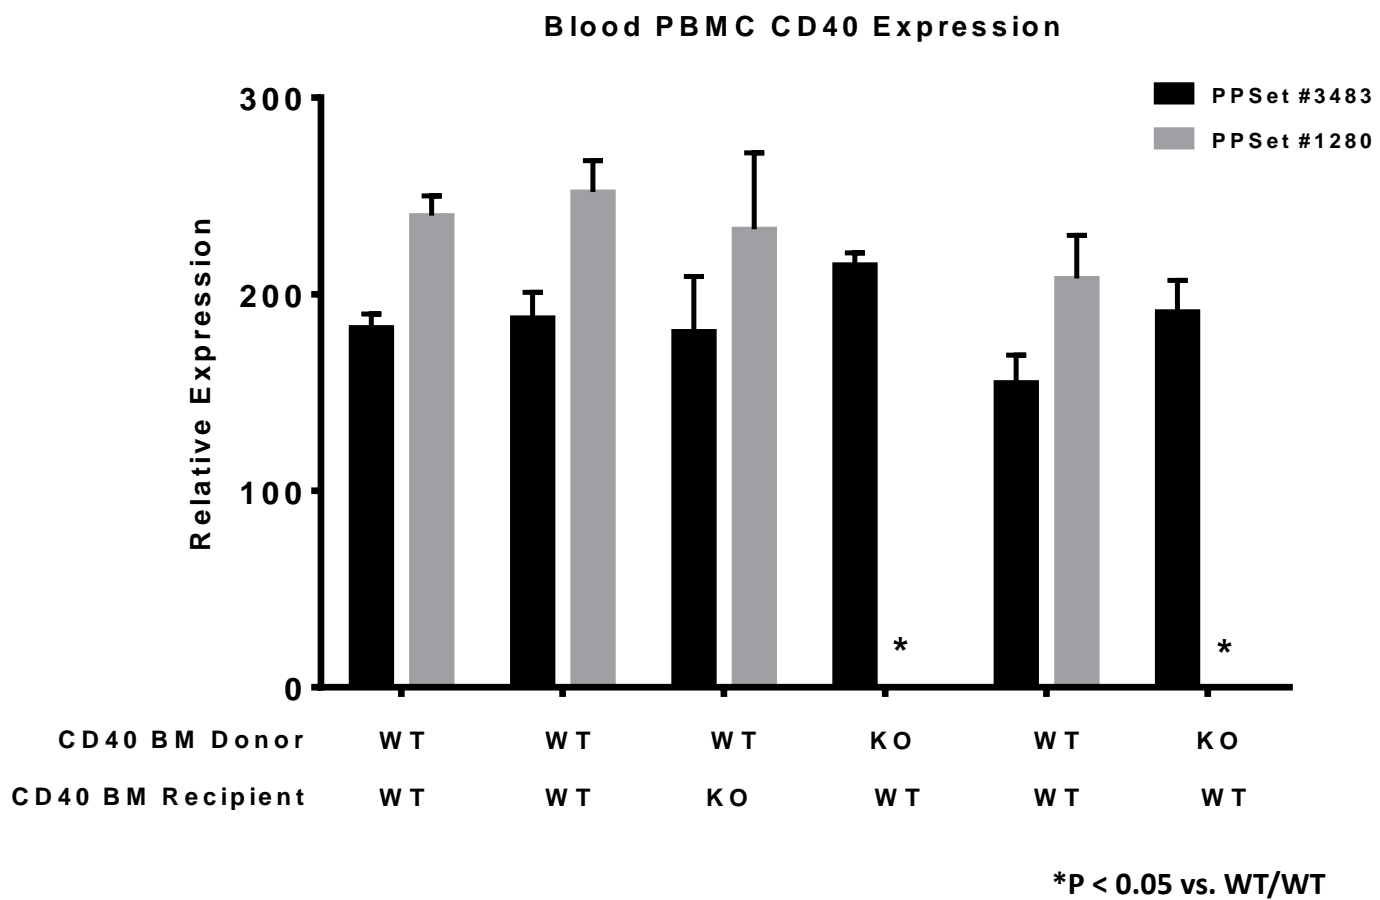

**Figure S4**

**Fold-change mRNA levels  $\pm$  SEM (§ except CD3d IHC), relative to PBS Dox animals**

|               | Dox             |                  |                  |                  | No Dox           |
|---------------|-----------------|------------------|------------------|------------------|------------------|
|               | PBS             | Con ASO-25       | CD40 ASO-12.5    | CD40 ASO-25      | PBS              |
| CD3d          | 1.00 $\pm$ 0.18 | 0.86 $\pm$ 0.11  | 0.87 $\pm$ 0.11  | 0.61 $\pm$ 0.04* | 0.56 $\pm$ 0.04* |
| CD4           | 1.00 $\pm$ 0.12 | 0.86 $\pm$ 0.14  | 0.90 $\pm$ 0.14  | 0.57 $\pm$ 0.08* | 0.36 $\pm$ 0.03* |
| CD8b          | 1.00 $\pm$ 0.13 | 0.90 $\pm$ 0.15  | 0.90 $\pm$ 0.15  | 0.56 $\pm$ 0.08* | 0.25 $\pm$ 0.01* |
| IL-2          | 1.00 $\pm$ 0.12 | 0.58 $\pm$ 0.11* | 0.60 $\pm$ 0.11* | 0.34 $\pm$ 0.04* | 0.24 $\pm$ 0.05* |
| CD3d IHC§     | 40 $\pm$ 23     | 37 $\pm$ 23      | 35 $\pm$ 24      | 24 $\pm$ 12      | 24 $\pm$ 8       |
| CD68          | 1.00 $\pm$ 0.18 | 0.99 $\pm$ 0.13  | 1.26 $\pm$ 0.17  | 1.10 $\pm$ 0.10  | 0.34 $\pm$ 0.02* |
| IL-12         | 1.00 $\pm$ 0.12 | 0.75 $\pm$ 0.14  | 0.91 $\pm$ 0.08  | 0.91 $\pm$ 0.11  | 0.38 $\pm$ 0.03* |
| TNF- $\alpha$ | 1.00 $\pm$ 0.17 | 0.69 $\pm$ 0.10  | 0.93 $\pm$ 0.08  | 0.80 $\pm$ 0.07  | 0.24 $\pm$ 0.01* |
| TGF- $\beta$  | 1.00 $\pm$ 0.08 | 0.94 $\pm$ 0.08  | 1.22 $\pm$ 0.06* | 1.00 $\pm$ 0.05  | 0.67 $\pm$ 0.06* |
| CTGF          | 1.00 $\pm$ 0.06 | 0.97 $\pm$ 0.11  | 0.69 $\pm$ 0.05* | 0.73 $\pm$ 0.05* | 0.46 $\pm$ 0.04* |
| CD206         | 1.00 $\pm$ 0.16 | 0.95 $\pm$ 0.11  | 0.88 $\pm$ 0.08  | 0.86 $\pm$ 0.15  | 0.45 $\pm$ 0.04* |

\*P < 0.05 vs. PBS (DOX)

**Table S1**

**Sequence information for the probe and primers used to generate the RT-PCR data**

**\* Sequence information not available from manufacturer (Life Technologies). Unique identifier listed.**

| Target mRNA                                  | Forward Primer              | Reverse Primer             | Probe                          |
|----------------------------------------------|-----------------------------|----------------------------|--------------------------------|
| <b>CCL5</b>                                  | GCAGTCGTGTTTGTCACTCGAA      | GATGTATTCTTGAACCCACTTCTCTC | AACCGCCAAGTGTGTGCCAACCC        |
| <b>CD206</b>                                 | GAATACACAGCACTAGCGTCTTAACAC | GGGCTTACGTGGTTGTTTCTAGA    | TAGGTCTCATGTCAACCCTGCAGATTCAAG |
| <b>CD3d</b>                                  | GAGGTTTCTCAAAGTGCCATAGC     | CGGAAGGAAACGTCTTTATTGG     | ACGGCGCCTTCCCCTGTGATC          |
| <b>CD4</b>                                   | Mm00442754*                 |                            |                                |
| <b>CD40 (#3483)</b>                          | CCATCTAGGGCAGTGTGTTACG      | CCTGGCTGGCACAATCAC         | ACAAACAGTACCTCCACGATGGCCAGTG   |
| <b>CD40 (#1280, to genotype the CD40 KO)</b> | AGCCAGGAAGCCGACTGA          | CCCTTGATTGGGTTACAGTGT      | ACTCAGGCGAATTC                 |
| <b>CD40L</b>                                 | Mm00441911*                 |                            |                                |
| <b>CD68</b>                                  | TTGGGAACACTACAGTGGGC        | CGGATTGAATTGGGCTTG         | AACGGCTCCAGCCTTGTGTTGAG        |
| <b>CD8b</b>                                  | Mm00438116*                 |                            |                                |
| <b>COL1A1</b>                                | TGGATTCCCGTTCGAGTACG        | TCAGCTGGATAGCGACATC        | AAGCGAGGGCTCCGACCCGA           |
| <b>E Selectin</b>                            | Mm01310197*                 |                            |                                |
| <b>F4/80</b>                                 | GGCATTGCCAGATTTTC           | CGGTTGAGCAGACAGTGAATGA     | CCAGATTGGCCCCTTGCAAGC          |
| <b>GAPDH</b>                                 | GGCAAATCAACGGCACAGT         | GGGTCTCGCTCCTGGAAGAT       | AAGGCCGAGAATGGGAAGCTTGTGATC    |
| <b>ICAM1</b>                                 | CCGCAGGTCCAATTCACACT        | CAGAGCGGCAGAGCAAAG         | CAGCTCGGAGGATCACAACGAAGCT      |
| <b>IL-12p40 (IL12/IL23)</b>                  | GCCAGTACACCTGCCACAAA        | GACCAAATTCATTTTCTTCTTG     | AGGCGAGACTCTGAGCCACTCACATCTG   |
| <b>IL-2</b>                                  | Mm00434256*                 |                            |                                |
| <b>MCP1</b>                                  | AGTTGACCCGTAATCTGAAGCTAA    | CACACTGGTCACTCCTACAGAAGTG  | CATCCACTACCTTTCCACAACCACCTCA   |
| <b>Nephrin</b>                               | Mm01176615*                 |                            |                                |
| <b>NGAL</b>                                  | GGCCTCAAGGACGACAACA         | ACCACCCATTGAGTTGTCAATG     | CATCTTCTGTCCCCACCGACCAA        |
| <b>TGF-β</b>                                 | AAACGGAAGCGCATCGAA          | GGGACTGGCGAGCCTTAGTT       | CCATCCGTGGCCAGATCCTGTCC        |
| <b>CTGF</b>                                  | Mm01192933_g1               |                            |                                |
| <b>TNF-α</b>                                 | CAGGTTCTGTCCCTTCACTCACT     | CTGTGCTCATGGTGTCTTTTCTG    | CCCAAGGCGCCACATCTCCCT          |
| <b>VCAM1</b>                                 | GGTGCTGTGACAATGACCTGTT      | ATTATCTAACTTCTGCCCCAGAAAAT | CAGCGAGGGTCTACCAGCTCCTGAGA     |

**Table S2**
